# Supplementary material
Source: PubMed Central journal article supplement (PMC2646596)
Supplement: me.2008-0071_1.pdf [file me.2008-0071_1.pdf]

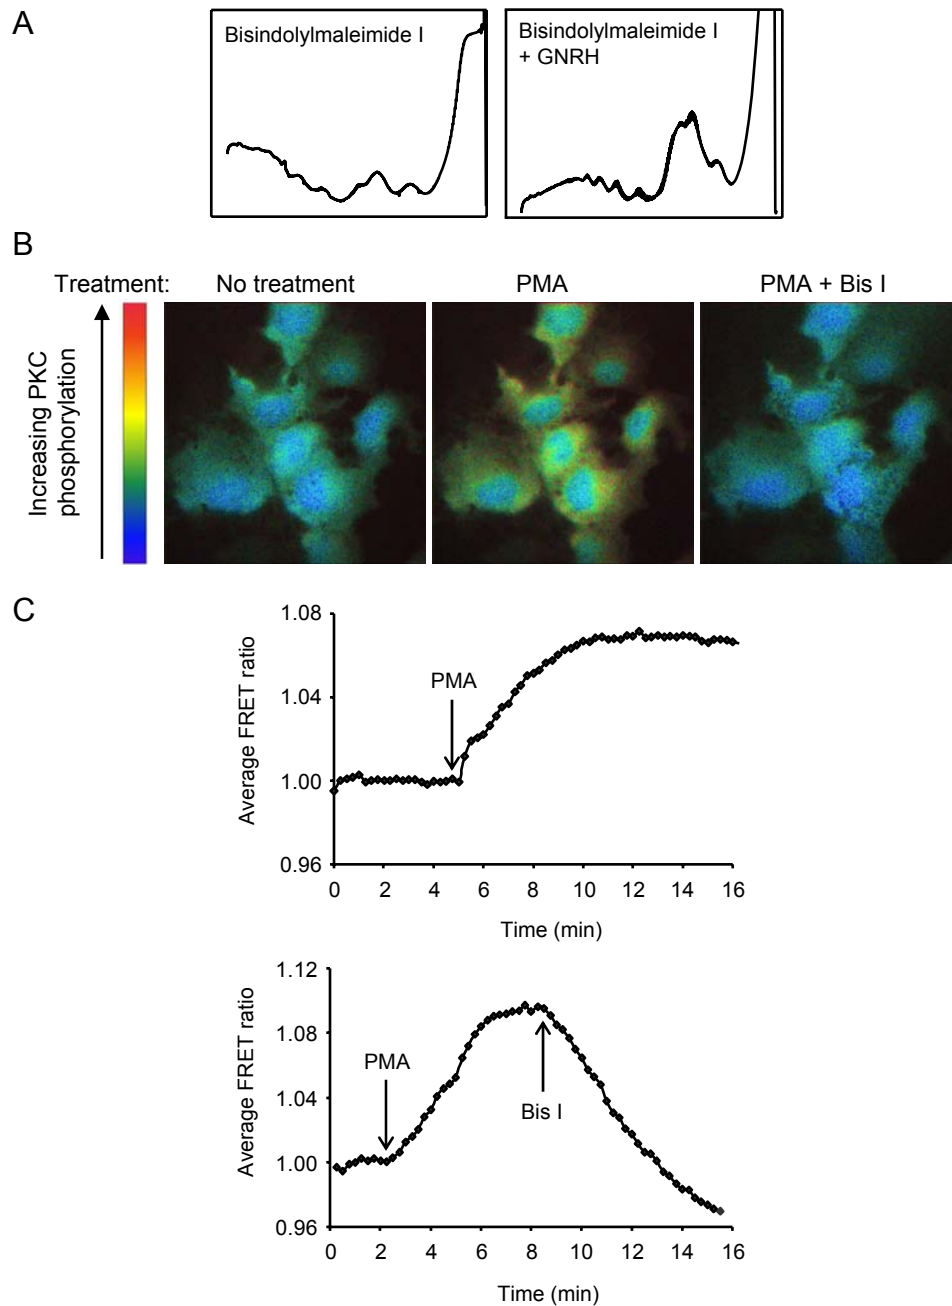

Figure S1. Accumulation of RNP complexes is not mediated by PKC activation. **(A)** L $\beta$ T2 cells were treated and ribosomes were fractionated while monitoring UV absorption. Shown are representative profiles from cells treated with bisindolylmaleimide I (bis I) to block PKC activation, prior to GNRH exposure for 30 minutes. **(B,C)** The efficacy of bis I was confirmed through use of a FRET-based PKC activation reporter in COS7 cells. Bis I was able to inhibit phorbol-12-myristate-13-acetate (PMA)-induced PKC activation. **(B)** Representative images of individual cells measured for FRET (PKC) activity. **(C)** Graphed is the average FRET ratio of several cells imaged simultaneously. The arrows indicate the times at which each drug was added.

## Supplemental Figure 1
